# Supplementary material for: The Arabidopsis sn-1-specific mitochondrial acylhydrolase AtDLAH is positively correlated with seed viability
Source: PubMed Central journal article supplement — J Exp Bot. 2011 Aug 18;62(15):5683–98. doi: 10.1093/jxb/err250 (PMC3223057; doi:10.1093/jxb/err250), 2011-08-18

**The *Arabidopsis sn-1*-specific mitochondrial acylhydrolase AtDLAH is positively correlated with seed viability**

**Young Sam Seo<sup>1</sup>, Eun Yu Kim<sup>1</sup>, and Woo Taek Kim\***

Department of Biology, College of Life Science and Biotechnology, Yonsei University, Seoul  
120-749, Korea

## Supplementary materials and methods

### *Tetrazolium-uptake assay*

Seeds were incubated in 1% (w/v) 2,3,5-triphenyltetrazolium chloride (Sigma-Aldrich, St. Louis, MO, USA) for 2 days in the dark at 30°C (Debeaujon and Koornneef, 2000). The tetrazolium salts were reduced to formazon, a red-like colored end product, by NADH-dependent reductases localized to the endoplasmic reticulum (Berridge, 1996). Seed staining was observed under a light microscope (Olympus).

### *Ruthenium red staining*

Dry seeds were incubated with 0.01% (w/v) ruthenium red (Sigma-Aldrich) for 30 min with agitation at room temperature and rinsed by extensive washing with distilled water (Arsovski *et al.*, 2009). Seed staining was observed under a light microscope (Olympus).

**Supplementary Table S1.** The sequence of primers used for cloning of *AtDLAH* cDNA, construction of MBP fusion, GFP fusion, transgenic plants, genotyping PCR, and RT-PCR in this study.

| Gene                                                 | Foward Primers (F)                 | Reverse Primer (R)                       |
|------------------------------------------------------|------------------------------------|------------------------------------------|
| Cloning of <i>AtDLAH</i> cDNA                        |                                    |                                          |
| <i>AtDLAH</i>                                        | 5'-teggatccatggagaacgcattggtc-3'   | 5'-gtaaacgacggccagtccaagcttc-3'          |
| Construction of MBP:N terminal lacking <i>AtDLAH</i> |                                    |                                          |
| <i>AtDLAH</i>                                        | 5'-teggatcctcagccgacgattttctg-3'   | 5'-gtaaacgacggccagtccaagcttc-3'          |
| Construction of 35S: <i>AtDLAH-GFP</i>               |                                    |                                          |
| <i>AtDLAH</i>                                        | 5'-caaagagccgtcctgacaag-3'         | 5'-gactcgagaaaatccaatgtggcgtgag-3'       |
| Construction of 35S: <i>AtDLAH-HA</i>                |                                    |                                          |
| <i>AtDLAH</i>                                        | 5'-gcagatctatggcaggtaccatac-3'     | 5'-gagcgcccgagctcagtgacgcctctagaggaac-3' |
| Construction of 35S: <i>AtDLAH</i> transgenic plants |                                    |                                          |
| <i>AtDLAH</i>                                        | 5'-gcagatctatggagaacgcattggtcaa-3' | 5'-cggagctctcataagctataaatagttttggtc-3'  |
| Genotyping PCR of <i>atdlah</i>                      |                                    |                                          |
| <i>AtDLAH</i>                                        | 5'-aacaacaccttccaagaggag-3'        | 5'-ttggaatctttgctccatg-3'                |
| RT-PCR                                               |                                    |                                          |
| <i>AtDLAH</i>                                        | 5'-gtgcgccgagggtaggtaac-3'         | 5'-gttttggtccggtcggtaac-3'               |
| <i>AtCYCD3</i>                                       | 5'-tcgggtacctccatcag-3'            | 5'-gagtggtctacgattgcc-3'                 |
| <i>AtCYC2b</i>                                       | 5'-gagcagcaatggccgg-3'             | 5'-cattgctaccacaccattgtg-3'              |
| <i>AtPCNA</i>                                        | 5'-agggctcgttgaag-3'               | 5'-cttcaatctaggagcc-3'                   |
| <i>AtEXP5</i>                                        | 5'-ggtacggcaatctgtatagc-3'         | 5'-gttcccacacatatattgc-3'                |
| <i>AtACT8</i>                                        | 5'-tactgattacctcatgaagatcctac-3'   | 5'-aaacgatgtctcttagttagaagc-3'           |

## Supplementary Figure Legends

**Supplementary Fig. S1.** Sequence analysis of *Arabidopsis* AtDLAH. (A) Multiple alignments of five DAD1-like acylhydrolases from different plant species. The derived amino acid sequence of AtDLAH is compared with those of poplar protein (*Populus trichocarpa*, XP\_002314049.1; 68% identity), castor bean triacylglycerol lipase (*Ricinus communis*, XP\_002531054.1; 63% identity), grape protein (*Vitis vinifera*, XP\_002272780.1; 59% identity), and rape chloroplast lipase (*Brassica napus*, ACJ76846.1; 45% identity). The lipase consensus sequence (GHSLG) and the catalytic triad (Ser, Asp, and two candidate His residues) are indicated. (B) Phylogenetic relationship of the five DAD1-like acylhydrolase homologs from *Arabidopsis* (AtDLAH), poplar, castor bean, grape, and rape.

**Supplementary Fig. S2.** Expression levels of cell cycle- and cell elongation-related genes in wild-type, *35S:AtDLAH*, and *atdlah* mutant seedlings. Steady-state mRNA levels of cell cycle- and cell elongation-associated genes were determined by RT-PCR in light-grown 3- or 7-day-old wild-type, *35S:AtDLAH* transgenic (lines #2 and #3), and *atdlah* mutant seedlings. The D-type cyclin *AtCYCD3*, cell cycle-dependent kinase-related gene *AtCDC2b*, and S-phase-specific proliferating cell nuclear antigen (*AtPCNA*) were used as cell cycle-related genes and expansin *AtEXP5* as a cell elongation-related gene. Actin (*AtACT8*) was used as a loading control.

**Supplementary Fig. S3.** Germination analysis of wild-type, *35S:AtDLAH*, and *atdlah* mutant seeds in response to ABA. Wild-type, *35S:AtDLAH* transgenic (lines #2, #3, #4, #6 and #7), and *atdlah* mutant seeds were germinated in the presence or absence of different concentrations (0.1, 0.5, and 1  $\mu$ M) of ABA. Enlarged pictures in the lower panels depict

the detailed germination patterns of wild-type, *35S:AtDLAH* transgenic (line #2), and *atdlah* mutant plants 3-days after germination.

**Supplementary Fig. S4.** Vital staining with tetrazolium and mucilage release of seeds. (A) Wild-type, *AtDLAH*-overexpressing (lines #2 and #3), and *atdlah* mutant seeds were stained with tetrazolium under normal (upper panel) or accelerated-aging (lower panel) conditions and observed under a light microscope. Scale bars = 500  $\mu\text{m}$ . (B) Mucilage release of wild-type, *AtDLAH*-overexpressing T4 transgenic, and *atdlah* mutant seeds. Light microscopic examination of the mucilage layers of wild-type, *AtDLAH*-overexpressing, and *atdlah* mutant seeds following incubation with ruthenium red. Scale bars = 500  $\mu\text{m}$ .

**Supplementary Fig. S5.** Neutral lipid content of wild-type, *AtDLAH*-overexpressing T4 transgenic, and *atdlah* mutant seeds. Total lipids were extracted from wild-type, *AtDLAH*-overexpressing transgenic (lines #2 and #3), and *atdlah* mutant seeds under normal and accelerated-aging conditions. TLC of total neutral lipids (12  $\mu\text{g}$  in left panel and 200  $\mu\text{g}$  in right panel) was developed with petroleum ether/ether/ $\text{CH}_3\text{COOH}$  (70:29:1, v/v/v) and visualized by iodine vapor. Three neutral lipids, TAG, DAG, and MAG, are indicated.

**A**

```

AtDLAH      1  MENALVKTPLR-KLRRRTKRVWRLKQKLLAWKSTKIRVKS---HLPGLSTKHKLFHIKSRKEEQDLSQVAQRIC---KISNDSTKS
caster_bean 1  MEMSPLRQPVA-TKKTMSRKARRIWKLLTWTWRAIKKAFPS---KHRLRLSCTGNMKQLSTFKLHQELATKTKKNG---DCHP--HKT
grape       1  MELLPSKKVTSGKMRRGKTKRAR----KSGFWSAIIKKALSAMKKHHLHMTCASLKLQSGISDGMVTPLRQLQSEEPKHKVSHGGKS
rape       1  MATIPSHN-----LLPNPTINQSAHS-----LSFKPQSTLLNFPARSSPAAVTRAISR-----TDGASISSR
poplar     1  -----

AtDLAH      83  LAFLLQLPKYSADDFLDGRGLMTPAASPPEKISKMWRELHGSNNWENLLDPLHPWLRREVTKYGEFVSVYDLSLDFDPLSEFCGSSRYNR
caster_bean 81  LAHLLVP--RTALDFIDRGDQMTPLSPKENISSRWQEIHGSRNWNENLLDPLHPWLRREVVKYGEFVEATYDAFDLDFLSYCGSCLYNR
grape      87  LESLMR-VAYTAGDFIDRGNHMTPTSPREHISAKWREIHGFQFNWESLLDPLHPWLRREIVKYGEFSQATYDAFDYDFSDFCGSCRYNR
rape      59  LEPVEKYEITAAGDVRRRDREAKEKTLRLD----TWKIQGEDDWAGLMDPEMDPVLRESELIRYGEEMAQACYDAFDLDFPSRYCGSCRFTR
poplar     1  -----MTPPLSPKQISISAVWKEIHGSSNWETLLDFPHPSLRREILKYGEFAQGTYDAFDLDFLSDFCGSCRYNR

AtDLAH     173  NKLFEELGLLTRHGYKVTKYIYAMSRVDVPQWFLSSALGETWSKDSNWMGFVAVSGDRSGL--RIGRRDIVVAWRGTVTPTEWFMDLRTSM
caster_bean 169  HKLFEELGLTKHGYRATKYIYAMSHVDVPEWFARTHT--TWSKDSNWMGFVAVSNDQESQ--RIGRRDIMVAWRGTVAPTETWYNDLRTDL
grape     176  HKLFDLHLTKHGYKVTKYIYAMTNIDVPSWFERPNTGETWSKDSNWMGFVAVSDNESQ--RIGRRDIVVAWRGTVAPSEWFLDMKASL
rape     145  KKLFDLGLFDSCYEAAARVLYATSNINLNFFFSKSRWSKWSKNANWMGYVAVSDDSEATHRLGRRDIAIAWRGTVTQLLEWIADLKDFL
poplar    70  RKLFEELGLTKHGYKVTKYIYALSHVDVPEWLKRSYA--TWSKDSNWMGFVAVSRRESQ--RIGRRDIMVAWRGTVSPSEWFKDLTTSL

AtDLAH     261  EPPD-CEGKHGKTVVKVQSGFLSIVNSKSELTRYNKESASEQTMDEVKRLVNFVKDR-GEEVSLTITGHSLGGALALMNAVEAARDVPAL
caster_bean 255  EYFE-EDQDHKKNHVKVQEGFLSIVKSKSEETRYNKLSASEQVMKELKKLVNLYREN-GEEVSLTITGHSLGGALALMNAVEAATSIPNV
grape    264  EQIG-E-----GVKVESGFHSIYASKSESTRYNKLSASEQVMEAVKRLLEFFKGR-GEEVSLTITGHSLGGALALMNAVEAASSLEDL
rape    235  KPVSGNGFRCDPAVKAESGFLDLITDKDTS CNFSKFSAREQLLTVKRLVERYGDEEGDLSITITGHSLGGALAVLSAYDVAEMGLNR
poplar   156  EHID-N-----TNVKVQEGFLSVYKSKDELTRYNKLSASEQVMQEVMLVNFYRKG-GEEVSLTITGHSLGGALALMNAVEAATAIPDL

AtDLAH     349  SG-----NISVISFGAPRVGNLAFKEKLNLSGVKVLRVVVKQDIVPKLPGIVFNK-VLNKLNPISTRLNWVYRHVGTQLKLDVFSFPVVK
caster_bean 343  F-----ISVISFGAPRVGNLAFKEKLNLSGVKTLRVVVKQDIVPKLPGIIVNK-ILNKLSKITHLNWWVYRHVGTQLKLDVFSFPVVK
grape    346  D-----HISVISFGAPRVGNIAFRDKMNEGVKTLRVVVKQDIVPKLPGIICNK-ILRQIHALTRRLKWWVYRHVGSSELKLDMSLSPYLK
rape    325  TKNGKVVVPTVFTYSAPRVGNIRFERMEELGVKVLRVVVKQHDVVPKSPGLFLNEHAPHALKQLAGGLPWCYCHVGEKLA LDHQNSPFLK
poplar   238  F-----VSVISFGAPRVGNIAFKEKLNLSGVKTLRVVVKQDVVPKLPGL-LLNK-MLNKFHGLTGKLNWVYRHVGTQLKLDVFSFPVVK

AtDLAH     433  RDSDLGRAHNLVYLVLDGFFHRKKSQFRVNRARDVASVNSDMDLHDHRIPEFWYQVAHKGLILNKQTGRWVKFVRA-PEDIPSPFLPT
caster_bean 425  QESDMSGSHNLEVYLHLLDGFGLGKLNRYRNARRDALVNRSTNMLIEELKIPFWMYQLPHKGLVLN-KYGRWVKPSRV-AEDIPSPFSS
grape    429  REFLLGFHNLEIYLHLLDGYVVGRLKFRWNARRDALVNRSSDMLIEELRIPECWYQVFNKGLVFN-SHGRWVKPCRD-QODIPSPFGE
rape    415  PSVDLSTAHNLEALHLLDGYHGGQRFLVSSGRDPAVNRASDFKDHFMVPPYWRDANKGMVRH-TDGRWIQPDRIRAEDHHAQDIH
poplar   319  PESDLSGSHNLELYLHLLIDGFFSKKSKYRNARRDALVNRGSDMLIEDLKIPEFWYQFPYKGLVLN-QYGRWVKPGR-LPEDIPSPLSI

AtDLAH     522  GPKPIYSL-----
caster_bean 513  EISRLDLSF-----
grape     517  APNNKRINIRKKYSYDKASKLINFEDKIGLFSVS
rape     504  HLLTQLHHPS-----
poplar    407  DTPPKHGRQS-----
    
```

**B**

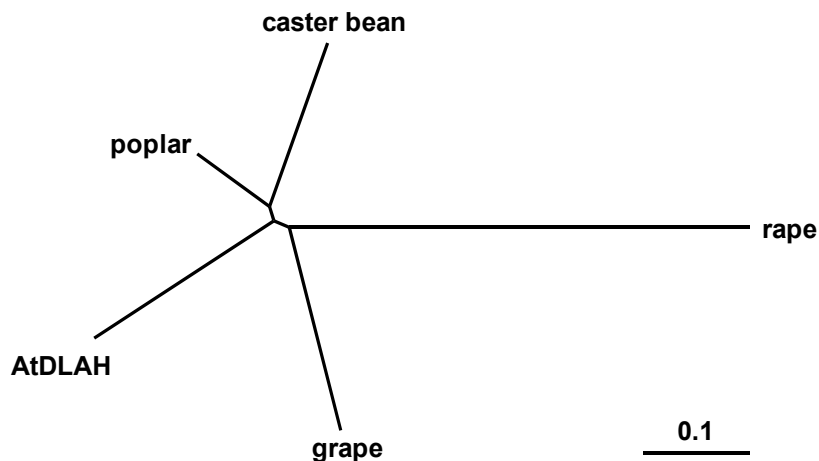

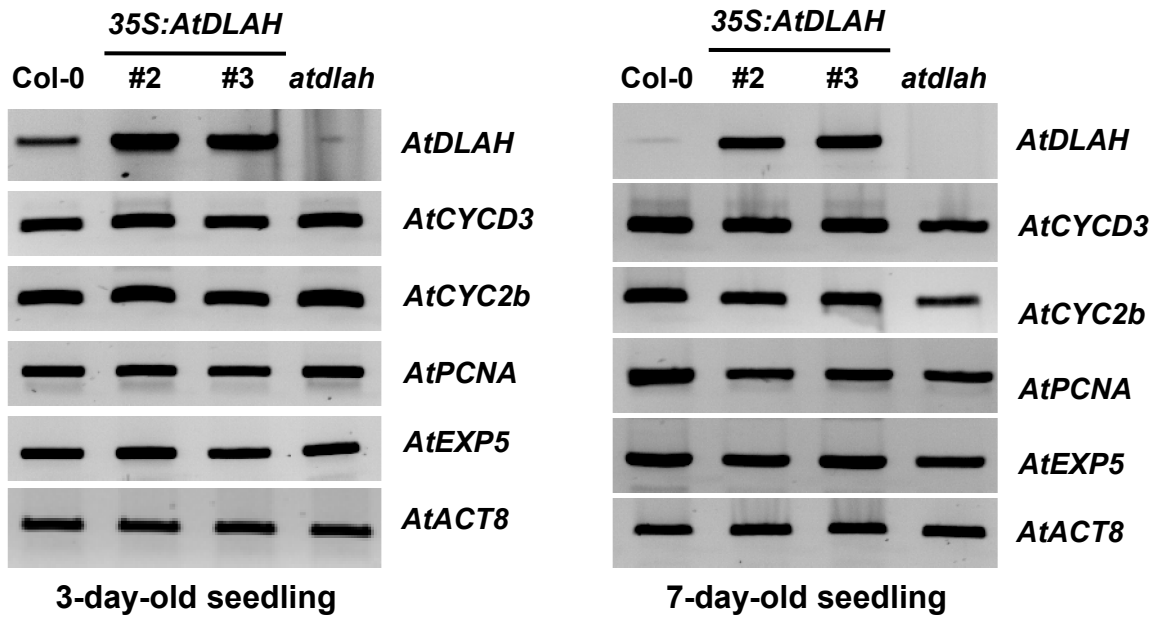

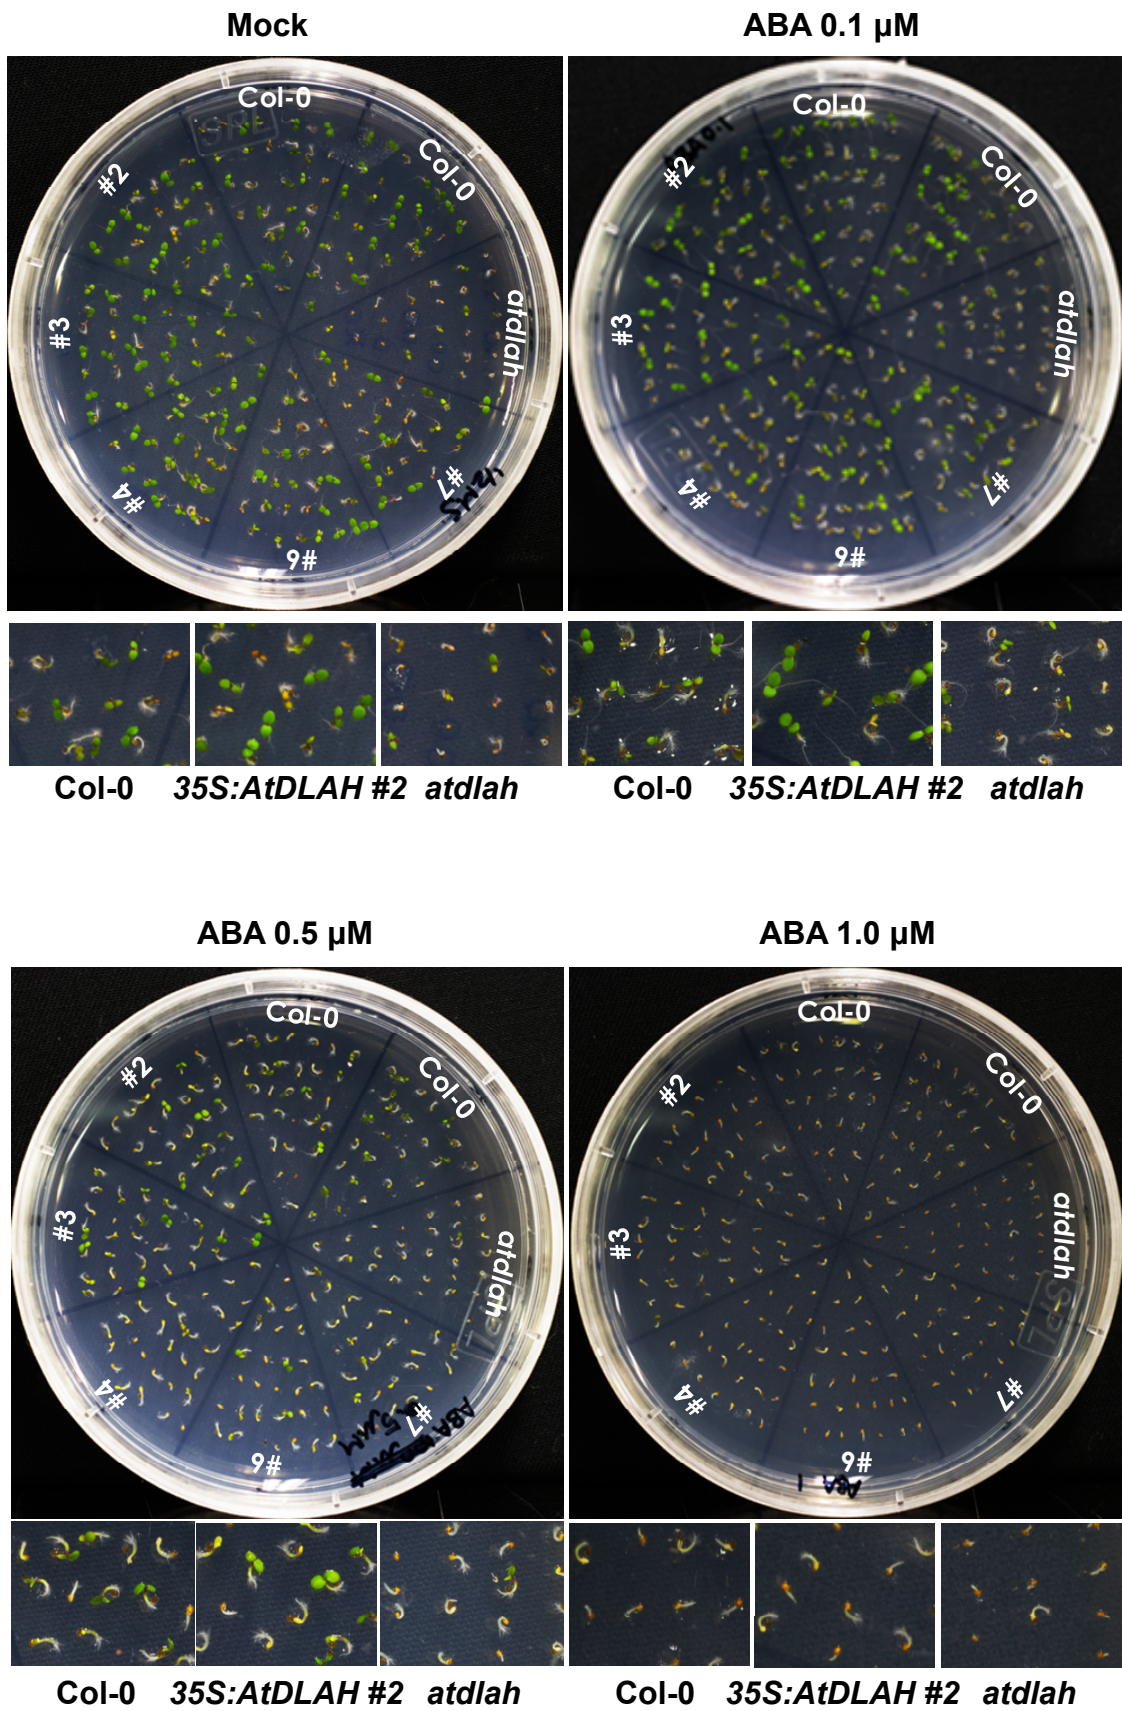



A

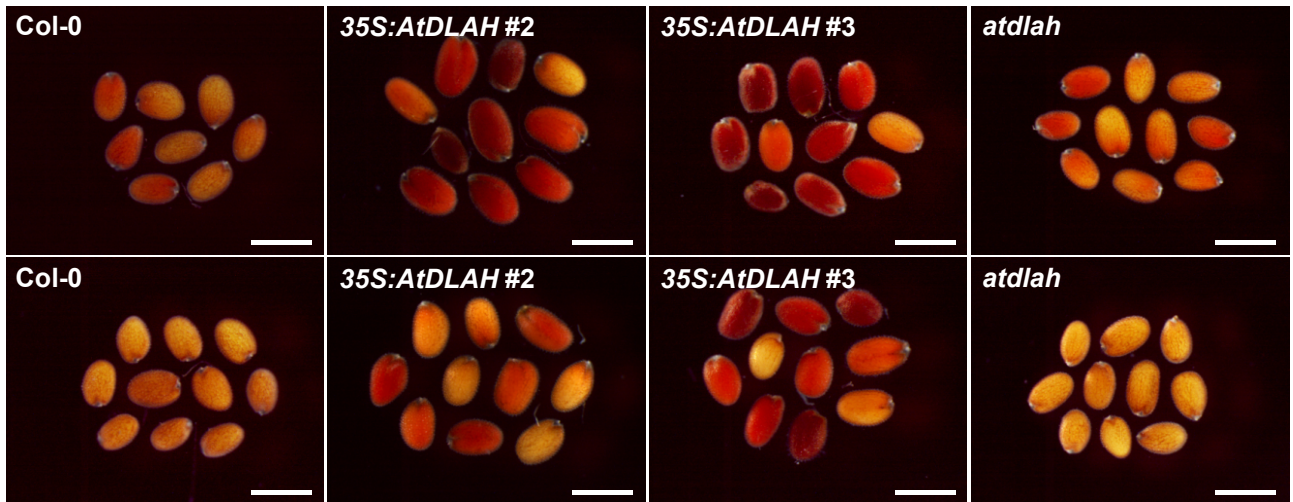

B

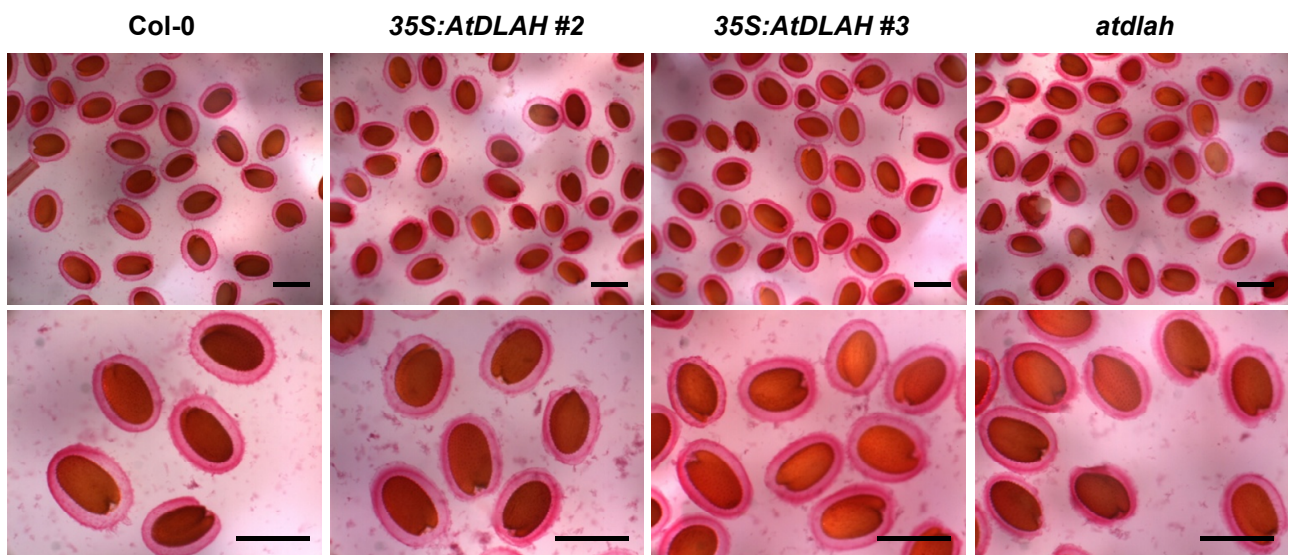

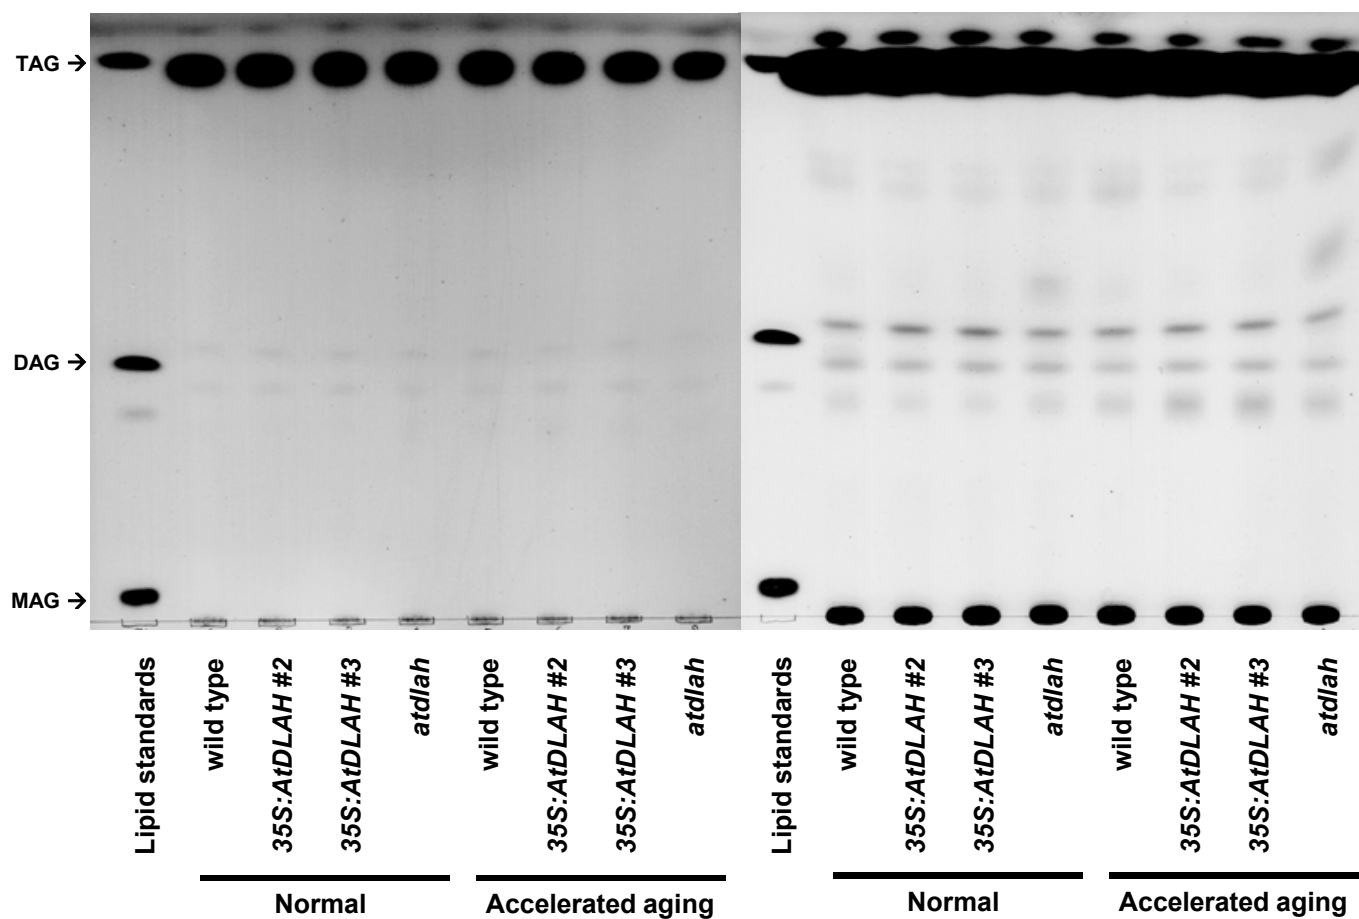

Supplement: supp_err250_00063982_file001.pdf [file supp_err250_00063982_file001.pdf]
